# Supplementary material for: Assessment of wearable Ultrasound Device Combined with AI for Portable Assessment of Central Venous Pressure Compared with Central Venous Catheterization as the reference Standard in critically ill patients: A Cross-Sectional Study
Source: Research Square preprint supplement (doi:10.21203/rs.3.rs-6316972/v1), 2025-04-30
Supplement: Supplementary file 1 [file 7dc7b3057e942c40225dc472.xlsx]

## Sheet: Sheet1
Appendix Table 1. baseline patient characteristics and wearable ultrasound parameters for the training and test sets of critically ill patients
	Training set（218 patients）			Validation set（54 patients）
	CVP≥8mmHg （87 patients）	CVP＜8mmHg （131 patients）	P	CVP≥8mmHg （22 patients）	CVP＜8mmHg （32patients）	P
Age (y)	58.86±18.14	52.21±21.27	0.018	58.05±16.03	52.47±18.10	0.25
Height(cm)	168（160-172）	170（160-173）	0.473	165（160-170）	170（163-171）	0.058
Weight（kg）	65（60-75）	67（60-75）	0.919	67（59-75）	65（55-75）	0.979
BSA (m2)	1.72±0.19	1.73±0.21	0.689	1.69±0.18	1.71±0.18	0.694
BMI (kg/m2)	23.94（21.48-27.04）	22.86（21.11-25.95）	0.386	24.78（20.62-26.24）	23.29（20.76-25.34）	0.271
SBP（mmHg）	135（115-148）	119（109-131）	<0.001	120（104-141）	119（109-138）	0.972
DBP（mmHg）	74（64-83）	68（62-77）	0.01	65（57-74）	72（60-81）	0.192
HR（bqm）	89（78-101）	89（80-100）	0.369	90（81-97）	98（84-102）	0.086
Breath（bpm/min）	20（18-24）	20（18-21）	0.148	20（18-22）	20（16-22）	0.507
Manual IJV Max Area （mm2）	200.13（164.72-270.32）	91.74（64.27-122.38）	<0.001	210.60（160.02-257.46）	78.41（65.44-110.42）	<0.001
Manual IJV Min Area（mm2）	145.35（96.93-189.05）	57.57（28.15-82.54）	<0.001	138.41（87.50-187.44）	45.11（20.43-57.88）	<0.001
Manual IJV Ratio	26.11（13.25-47.95）	34.30（18.75-57.54）	0.026	30.66（14.00-45.43）	49.48（18.03-72.35）	0.13
Manual CCA Area（mm2）	59.50（46.26-74.74）	55.31（63.62-71.18）	0.322	68.91（54.84-77.81）	54.35（44.22-65.99）	0.053
Manual IJV Max Area/CCA Are	3.54（2.83-4.94）	1.66（1.18-2.28）	<0.001	3.20（2.72-3.79）	1.55（1.00-2.15）	<0.001
DSTA-Net IJV Max Area（mm2）	234.18（184.37-292.65）	130.66（71.40-137.17）	<0.001	236.70（181.97-294.38）	87.95（74.47-123.80）	<0.001
DSTA-Net IJV Min Area（mm2）	152.26（101.65-199.28）	60.34（29.15-86.74）	<0.001	144.84（91.73-196.85）	47.61（21.44-61.24）	<0.001
DSTA-Net IJV Ratio	30.07（20.17-51.85）	37.99（22.71-58.43）	0.041	32.37（19.83-49.15）	51.41（22.43-75.58）	0.105
DSTA-Net CCA Area（mm2）	64.85（50.25-83.69）	60.02（47.07-78.60）	0.329	74.80（60.03-86.80）	59.37（50.03-74.70）	0.055
DSTA-Net IJV Max Area/CCA Area	3.59（3.03-5.04）	1.74（1.15-2.31）	<0.001	3.32（2.73-3.90）	1.59（1.01-2.34）	<0.001
CVP，mmHg	10（8-12）	4（3-6）	<0.001	9（8-9）	5（3-5.4）	<0.001
Manual DM-MLP CVP，mmHg	9.97（8.36-11.64）	4.50（2.88-5.44）	<0.001	9.05（7.81-10.08）	4.89（3.18-5.96）	<0.001
DSTA-Net DM-MLP CVP，mmHg	9.99（8.33-11.91）	4.35（2.72-5.61）	<0.001	9.00（7.64-10.65）	5.03（3.28-5.93）	<0.001
Appendix Table 2.The B-A consistency analysis between manual measurements and DSTA-Net model measurements in the training and testing set.
	Training set (218 patients)		Test set (54 patients)
	Mean Difference	LOA	Mean Difference	LOA
CVP<8mmHg
IJV Max Area (mm2)	-11.446	[-26.409, 3.517]	-11.989	[-28.392, 4.413]
IJV Min Area (mm2)	-2.997	[-6.472, 0.477]	-2.349	[-5.539, 0.841]
IJV Ratio	-3.425	[-9.977, 3.127]	-3.386	[-8.492, 1.720]
CCA Area (mm2)	-5.114	[-10.997, 0.769]	-6.018	[-12.233, 0.197]
IJV Max /CCA Area	-0.0626	[-0.321, 0.195]	-0.048	[-0.232, 0.135]
CVP≥8mmHg
IJV Max Area (mm2)	-26.215	[-52.041, -0.390]	-23.696	[-50.657, 3.264]
IJV Min Area (mm2)	-7.572	[-15.640, 0.496]	-6.989	[-15.034, 1.056]
IJV Ratio	-4.235	[-11.295, 2.824]	-3.877	[-11.781, 4.028]
CCA Area (mm2)	-5.51	[-12.305, 1.285]	-7.12	[-13.002, -1.238]
IJV Max /CCA Area	-0.126	[-0.650, 0.397]	-0.014	[-0.429, 0.402]
