# Supplementary material for: Assessment of wearable Ultrasound Device Combined with AI for Portable Assessment of Central Venous Pressure Compared with Central Venous Catheterization as the reference Standard in critically ill patients: A Cross-Sectional Study
Source: Research Square preprint supplement (doi:10.21203/rs.3.rs-6316972/v1), 2025-04-30
Supplement: Supplementary file 2 [file 53d63be34a773fb7eba666a0.pdf]

**Appendix Figure 1**

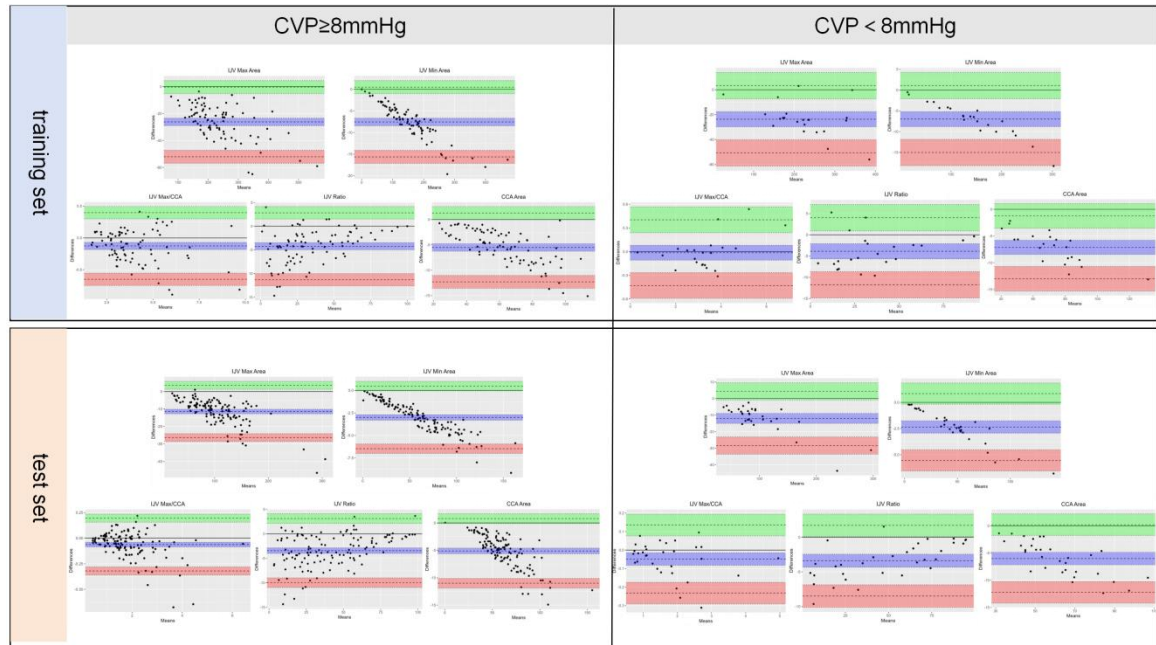

Appendix Figure 1. In the training set (above) and test set (below), Bland-Altman plots show the comparison of manual measurements and DSTA-Net model measurements for different CVP groups, including IJV Max Area, IJV Min Area, CCA Area, IJV Max/CCA Area, and IJV Ratio.
